# Supplementary material
Source: publisher figshare collection journal article supplement (https://acs.figshare.com/ndownloader/files/10838244)
Supplement: Supplementary file 1 [file 10838244]

Supporting Information for

# Deactivation Mechanism and Regeneration Study of Ga-Pt Promoted HZSM-5 Catalyst in Ethane Dehydroaromatization

*Xinwei Bai<sup>1</sup>, Anupam Samanta<sup>1</sup>, Brandon Robinson<sup>1</sup>, Lili Li<sup>2\*</sup>, Jianli Hu<sup>1\*</sup>*

\*Corresponding author; Email Addresses: [john.hu@mail.wvu.edu](mailto:john.hu@mail.wvu.edu);

[13672165360@163.com](mailto:13672165360@163.com)

1. Department of Chemical and Biomedical Engineering, Center for Innovation in Gas

Research and Utilization, West Virginia University, Morgantown, WV 26506, USA

2. School of Life Science and Agriculture, Zhoukou Normal University, Zhoukou

466000, China

**Table S1.** Performance statistics of hydrogen production of Ga-Pt/ZSM-5.

| Regenerated by<br>10 vol% O <sub>2</sub> | Performance Change, Compared to<br>Previous Cycle |        |        |        | Percentage<br>Change, Within<br>Single Cycle |
|------------------------------------------|---------------------------------------------------|--------|--------|--------|----------------------------------------------|
| Cycles\Time                              | 2.5 min                                           | 5 min  | 10 min | 15 min |                                              |
| Original                                 |                                                   |        |        |        | -6.0%                                        |
| 1st Regeneration                         | -28.5%                                            | -23.4% | -13.0% | -10.6% | 17.4%                                        |
| 2nd Regeneration                         | -3.5%                                             | -3.9%  | -4.7%  | -4.8%  | 15.9%                                        |
| 3rd Regeneration                         | -3.9%                                             | -4.6%  | -4.2%  | -3.7%  | 16.1%                                        |
| 4th Regeneration                         | -6.5%                                             | -5.4%  | -6.3%  | -1.6%  | 22.2%                                        |

| Regenerated by<br>2 vol% O <sub>2</sub> | Performance Change, Compared to<br>Previous Cycle |       |        |        | Percentage<br>Change, Within<br>Single Cycle |
|-----------------------------------------|---------------------------------------------------|-------|--------|--------|----------------------------------------------|
| Cycles\Time                             | 2.5 min                                           | 5 min | 10 min | 15 min |                                              |
| Original                                |                                                   |       |        |        | -5.8%                                        |
| 1st Regeneration                        | -16.4%                                            | -8.3% | -3.9%  | 1.1%   | 13.9%                                        |
| 2nd Regeneration                        | -2.6%                                             | -3.5% | -2.0%  | -2.3%  | 14.3%                                        |
| 3rd Regeneration                        | -5.4%                                             | -5.1% | -5.3%  | -5.0%  | 14.8%                                        |
| 4th Regeneration                        | -4.9%                                             | -4.5% | -3.8%  | -4.0%  | 15.9%                                        |

**Table S2.** Performance statistics of benzene production of Ga-Pt/ZSM-5.

| Regenerated by<br>10 vol% O <sub>2</sub> | Performance Change, Compared to<br>Previous Cycle |       |        |        | Percentage<br>Change, Within<br>Single Cycle |
|------------------------------------------|---------------------------------------------------|-------|--------|--------|----------------------------------------------|
| Cycles\Time                              | 2.5 min                                           | 5 min | 10 min | 15 min |                                              |
| Original                                 |                                                   |       |        |        | -17.7%                                       |
| 1st Regeneration                         | 10.4%                                             | 9.8%  | 8.7%   | 5.8%   | -21.1%                                       |
| 2nd Regeneration                         | -8.2%                                             | -8.0% | -7.3%  | -6.6%  | -19.8%                                       |
| 3rd Regeneration                         | -7.0%                                             | -7.2% | -6.5%  | -6.4%  | -19.2%                                       |
| 4th Regeneration                         | -8.4%                                             | -7.4% | -8.1%  | -8.2%  | -19.0%                                       |

| Regenerated<br>by 2 vol% O <sub>2</sub> | Performance Change, Compared to<br>Previous Cycle |       |        |        | Percentage<br>Change, Within<br>Single Cycle |
|-----------------------------------------|---------------------------------------------------|-------|--------|--------|----------------------------------------------|
| Cycles\Time                             | 2.5 min                                           | 5 min | 10 min | 15 min |                                              |
| Original                                |                                                   |       |        |        | -16.3%                                       |
| 1st Regeneration                        | 14.2%                                             | 15.1% | 10.8%  | 13.2%  | -17.0%                                       |
| 2nd Regeneration                        | -3.1%                                             | -4.2% | -4.1%  | -2.0%  | -16.1%                                       |
| 3rd Regeneration                        | -5.5%                                             | -5.6% | -6.2%  | -7.2%  | -17.6%                                       |
| 4th Regeneration                        | -5.7%                                             | -5.7% | -6.4%  | -4.3%  | -16.3%                                       |

**Table S3.** Performance statistics of toluene production of Ga-Pt/ZSM-5.

| Regenerated<br>by 10 vol% O <sub>2</sub> | Performance Change, Compared to<br>Previous Cycle |       |        |        | Percentage<br>Change, Within<br>Single Cycle |
|------------------------------------------|---------------------------------------------------|-------|--------|--------|----------------------------------------------|
| Cycles\Time                              | 2.5 min                                           | 5 min | 10 min | 15 min |                                              |
| Original                                 |                                                   |       |        |        | -22.2%                                       |
| 1st Regeneration                         | 33.8%                                             | 36.6% | 40.5%  | 42.4%  | -17.2%                                       |
| 2nd Regeneration                         | -9.5%                                             | -9.8% | -9.5%  | -10.2% | -17.9%                                       |
| 3rd Regeneration                         | -5.0%                                             | -6.0% | -8.4%  | -7.3%  | -19.8%                                       |
| 4th Regeneration                         | -9.1%                                             | -8.2% | -9.6%  | -13.0% | -20.8%                                       |

| Regenerated<br>by 2 vol% O <sub>2</sub> | Performance Change, Compared to<br>Previous Cycle |       |        |        | Percentage<br>Change, Within<br>Single Cycle |
|-----------------------------------------|---------------------------------------------------|-------|--------|--------|----------------------------------------------|
| Cycles\Time                             | 2.5 min                                           | 5 min | 10 min | 15 min |                                              |
| Original                                |                                                   |       |        |        | -22.6%                                       |
| 1st Regeneration                        | 26.3%                                             | 35.4% | 37.9%  | 40.2%  | -14.2%                                       |
| 2nd Regeneration                        | -1.8%                                             | -3.2% | -3.3%  | -3.7%  | -15.8%                                       |
| 3rd Regeneration                        | -5.2%                                             | -5.1% | -6.3%  | -7.9%  | -18.2%                                       |
| 4th Regeneration                        | -5.6%                                             | -5.9% | -6.9%  | -8.2%  | -20.4%                                       |
